# Supplementary material for: Combined prioritization and dereplication-based rapid identification of new 8-alkylated coumarins: podurins A and B from the leaves of Murraya paniculata and cytotoxic evaluation
Source: Royal Society of Chemistry journal article supplement (doi:10.1039/d4nj05468g), 2025-01-01

## **Combined Prioritization and Dereplication Based Rapid Identification of New 8-Alkylated Coumarine: Podurins A and B from Leaves of *Murraya paniculata* and Cytotoxic Evaluation<sup>†</sup>**

Sanju Kumari,<sup>a</sup> Vaishali Saini,<sup>c</sup> Sanheeta Chakrabarty,<sup>b</sup> Sanjay Kumar,<sup>b</sup> Hem Chandra Jha,<sup>c</sup> Jac Fredo Agastinose Ronickom,<sup>a</sup> Sanjeev Kumar,<sup>d</sup> Shreyans K. Jain<sup>\*b</sup>

<sup>a</sup>School of Biomedical Engineering, Indian Institute of Technology (Banaras Hindu University), Varanasi, 221005, Uttar Pradesh, India

<sup>b</sup>Department of Pharmaceutical Engineering and Technology, Indian Institute of Technology (Banaras Hindu University), Varanasi, 221005, Uttar Pradesh, India

<sup>c</sup>Department of Biosciences and Biomedical Engineering, Indian Institute of Technology Indore, Indore, Madhya Pradesh, India

<sup>d</sup>Department of Dravyaguna, Faculty of Ayurveda, Institute of Medical Sciences, Banaras Hindu University, Varanasi, 221005, Uttar Pradesh, India

\*Corresponding author: Department of Pharmaceutical Engineering and Technology, Indian Institute of Technology (Banaras Hindu University), Varanasi-221005, Uttar Pradesh

Email address: [sjain.phe@iitbhu.ac.in](mailto:sjain.phe@iitbhu.ac.in)

<sup>†</sup>This paper is offered in memory of Professor Ramarao Poduri (June 30, 1955 - December 7, 2024); our teacher and a researcher of pharmacology and toxicology, former director of NIPER Mohali.

**Table of contents:**

**Figure S.1:** Schematic representation of isolation scheme

**Figure S.2.** NMR Data of Mexoticin and Acacetin

**Spectral information of compound Podurin A**

**Figure S.3.** X-ray data of Podurin A

**Spectral information of Podurin B**

**Figure S.4.** X-ray data of Podurin B

**Spectral information of Mexoticin**

**Figure S.5.**  $^1\text{H}$  NMR spectrum of Mexoticin in  $\text{CDCl}_3$

**Figure S.6.**  $^{13}\text{C}$  NMR spectrum of Mexoticin in  $\text{CDCl}_3$

**Figure S.7.** HRMS spectrum of Mexoticin

**Spectral information of Vanillin**

**Figure S.8.** X-ray data of Vanillin

**Spectral information of Acacetin**

**Figure S.9.**  $^1\text{H}$  NMR spectrum of Acacetin in DMSO

**Figure S.10.**  $^{13}\text{C}$  NMR spectrum of Acacetin in DMSO

**Figure S.11.** DEPT-135 NMR spectrum of Acacetin in DMSO

**Figure S.12.**  $^1\text{H}$ - $^1\text{H}$  COSY NMR spectrum of Acacetin in DMSO

**Figure S.13.** HSQC NMR spectrum of Acacetin in DMSO

**Figure S.14.** HMBC NMR spectrum of Acacetin in DMSO

**Figure S.15.** HRMS spectrum of Acacetin

**Figure S.16.** Flow chart of isolation scheme of compounds

**Figure S.17.**  $^1\text{H}$  NMR spectrum of Podurin A in  $\text{CDCl}_3$

**Figure S.18.**  $^{13}\text{C}$  NMR spectrum of Podurin A in  $\text{CDCl}_3$

**Figure S.19.** COSY NMR spectrum of Podurin A in  $\text{CDCl}_3$

**Figure S.20.** HSQC NMR spectrum of Podurin A in  $\text{CDCl}_3$

**Figure S.21.** HMBC NMR spectrum of Podurin A in  $\text{CDCl}_3$

**Figure S.22.** Keto-enol conversion of Podurin A

**Figure S.1:** Schematic representation of isolation scheme

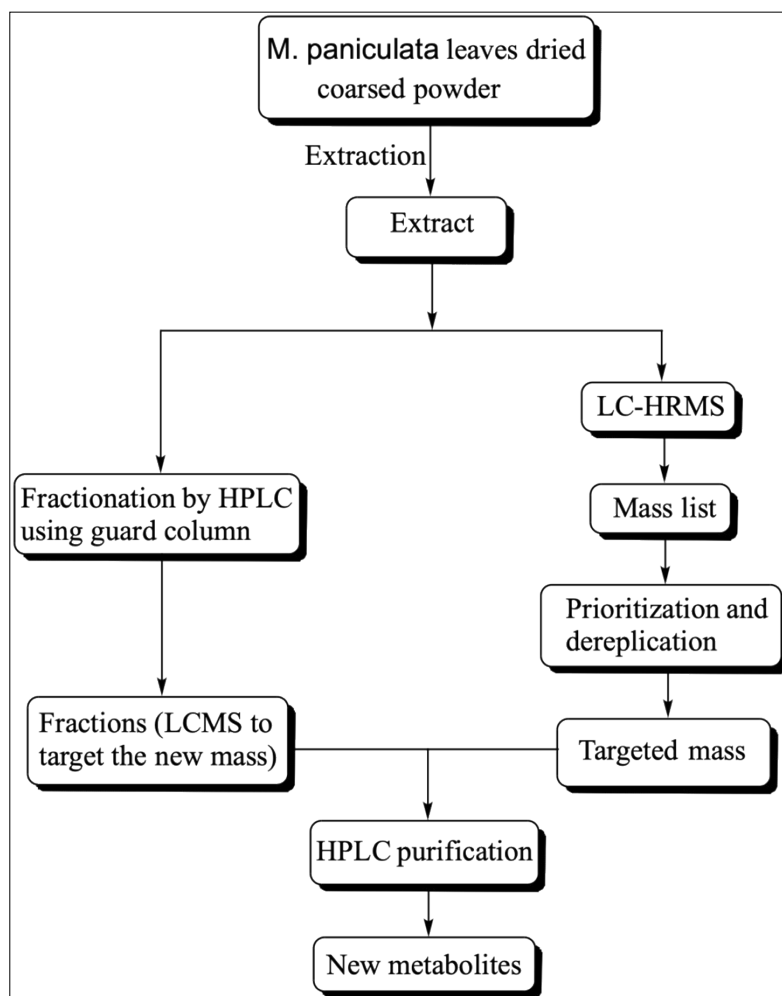

**Figure S.2.** NMR Data of Mexoticin and Acacetin

**Mexoticin** 500 mg, white solid, HRESIMS  $m/z$  291.1217 [M+H-H<sub>2</sub>O] +1 (calcd for C<sub>16</sub>H<sub>20</sub>O<sub>6</sub> + H<sup>+</sup>, 308.1260) <sup>1</sup>H NMR (500 MHz, CDCl<sub>3</sub>)  $\delta$ : 1.32 (6H, d, J= 5), 2.33 (1H, d, J= 20), 2.89 (1H, d, J=5), 3.59 (1H, brs s), 3.94 (6H, d, J=5), 6.14 (1H, d, J=10), 6.35 (1H, S), 7.99 (1H, d, J=5). <sup>13</sup>C NMR (126 MHz, CDCl<sub>3</sub>)  $\delta$ : 161.2, 155.8, 154.2, 138.8, 111, 107.5, 104, 90.4, 78.5, 73, 56.2, 56, 26.2, 25.1, 23.9.

**Acacetin** 10mg, powder, HRESIMS  $m/z$  285.0757 [M+H]<sup>+</sup> (calcd for C<sub>16</sub>H<sub>12</sub>O<sub>5</sub> + H<sup>+</sup>, 284.0685), <sup>1</sup>H NMR (600 MHz, dms<sub>o</sub>-d<sub>6</sub>)  $\delta$ : 3.86 (3H, S), 6.21 (1H, d, J= <5), 6.51 (1H, d, J= 6), 6.87 (1H, S), 7.11 (2H, d, J= 12), 8.03 (2H, d, J= 12), 12.92 (1H, S). <sup>13</sup>C NMR (151 MHz, dms<sub>o</sub>-d<sub>6</sub>)  $\delta$ : 182.2, 164.9, 163.7, 162.8, 161.9, 157.8, 128.8, 123.3, 115.1, 104.2, 104, 99.4, 94.5, 56.

## Spectral information of compound Podurin A

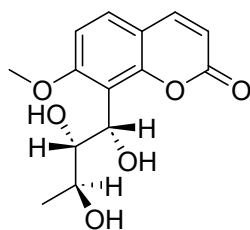

**Figure S.3.** X-ray data of Podurin A

checkCIF/PLATON report

Structure factors have been supplied for datablock(s) sk5c\_auto

THIS REPORT IS FOR GUIDANCE ONLY. IF USED AS PART OF A REVIEW PROCEDURE FOR PUBLICATION, IT SHOULD NOT REPLACE THE EXPERTISE OF AN EXPERIENCED CRYSTALLOGRAPHIC REFEREE.

No syntax errors found. CIF dictionary Interpreting this report

---

Datablock: sk5c\_auto

Bond precision: C-C = 0.0035 Å Wavelength=1.54184

Cell: a=9.78624(14) b=14.74804(17) c=10.33498(15)  
alpha=90 beta=114.7462(18) gamma=90

Temperature: 293 K

|                        | Calculated | Reported   |
|------------------------|------------|------------|
| Volume                 | 1354.65(4) | 1354.65(4) |
| Space group            | P 21/n     | P 1 21/n 1 |
| Hall group             | -P 2yn     | -P 2yn     |
| Moiety formula         | C14 H14 O6 | C14 H14 O6 |
| Sum formula            | C14 H14 O6 | C14 H14 O6 |
| Mr                     | 278.25     | 278.25     |
| Dx,g cm <sup>-3</sup>  | 1.364      | 1.364      |
| Z                      | 4          | 4          |
| Mu (mm <sup>-1</sup> ) | 0.913      | 0.913      |
| F000                   | 584.0      | 584.0      |
| F000'                  | 586.13     |            |
| h,k,lmax               | 11,17,12   | 11,17,12   |
| Nref                   | 2477       | 2459       |

Tmin,Tmax            0.858,0.896            0.467,1.000  
Tmin'                0.856

Correction method= # Reported T Limits: Tmin=0.467 Tmax=1.000 AbsCorr = MULTI-SCAN

Data completeness= 0.993 Theta(max)= 68.110

R(reflections)= 0.0599( 2137)      wR2(reflections)=  
0.1851( 2459)

S = 1.082            Npar= 186

The following ALERTS were generated. Each ALERT has the format

test-name\_ALERT\_alert-type\_alert-level.

---

Click on the hyperlinks for more details of the test.

●Alert level C

DIFMN02\_ALERT\_2\_C The minimum difference density is < -0.1\*ZMAX\*0.75

\_refine\_diff\_density\_min given = -0.697 Test value = -0.600

DIFMN03\_ALERT\_1\_C The minimum difference density is < -0.1\*ZMAX\*0.75 The relevant atom site should be identified.

PLAT098\_ALERT\_2\_C Large Reported Min. (Negative) Residual Density            -0.70            eA-3

PLAT220\_ALERT\_2\_C NonSolvent      Resd 1 O      Ueq(max)/Ueq(min) Range  
3.4 Ratio PLAT242\_ALERT\_2\_C Low      'MainMol' Ueq as Compared to Neighbors of  
C00H Check PLAT309\_ALERT\_2\_C Single Bonded Oxygen (C-O > 1.3 Ang) .....  
O00J Check PLAT767\_ALERT\_4\_C INS Embedded LIST 6 Instruction Should be

LIST 4 Please Check PLAT906\_ALERT\_3\_C Large K Value in the Analysis of Variance .....            2.512

Check PLAT911\_ALERT\_3\_C Missing FCF Refl Between Thmin & STh/L= 0.600

6 Report

-5 16 2, -10 9 3, 6 11 4, -5 10 9, -8 8 10, -5 8 11,

---

●Alert level G

PLAT003\_ALERT\_2\_G Number of Uiso or U(i,j) Restrained non-H-Atoms      2            Report

PLAT007\_ALERT\_5\_G Number of Unrefined Donor-H Atoms .....      2 Report

H002 H004

PLAT072\_ALERT\_2\_G SHELXL First Parameter in WGHT Unusually Large            0.11            Report

PLAT177\_ALERT\_4\_G The CIF-Embedded .res File Contains DELU Records

1 Report PLAT192\_ALERT\_3\_G A Non-default DELU Restraint Value for First Par      0.0010 Report

PLAT192\_ALERT\_3\_G A Non-default DELU Restraint Value for SecondPar      0.0010            Report

PLAT199\_ALERT\_1\_G Reported \_cell\_measurement\_temperature ..... (K)            293            Check

PLAT200\_ALERT\_1\_G Reported \_diffn\_ambient\_temperature ..... (K)            293            Check

PLAT720\_ALERT\_4\_G Number of Unusual/Non-Standard Labels .....            34

Note

O001            O002            H002            O003            O004      H004            O005      C006

|           |           |      |      |      |      |      |      |
|-----------|-----------|------|------|------|------|------|------|
| C007      | C008      | H008 | C009 | C00A | C00B | H00B | C00C |
| C00D      | H00D      | C00E | H00E | C00F | H00F | C00G | H00G |
| C00H H00J | C00I H00K | H00A | H00C | H00H | O00J | C00K | H00I |

PLAT793\_ALERT\_4\_G Model has

|                                 |                                                   |         |         |       |      |        |
|---------------------------------|---------------------------------------------------|---------|---------|-------|------|--------|
|                                 | Chirality                                         | at C008 | (Centro | SpGr) | S    | Verify |
| PLAT793_ALERT_4_G Model has     | Chirality                                         | at C00B | (Centro | SpGr) | R    | Verify |
| PLAT860_ALERT_3_G               | Number of Least-Squares Restraints                | .....   | 1       |       | Note |        |
| PLAT909_ALERT_3_G               | Percentage of I>2sig(I) Data at Theta (Max) Still |         | 74%     |       | Note |        |
| PLAT912_ALERT_4_G               | Missing # of FCF Reflections Above STh/L= 0.600   |         | 12      |       | Note |        |
| PLAT969_ALERT_5_G               | The 'Henn et al.' R-Factor-gap value .....        |         | 5.162   |       | Note |        |
| Predicted wR2: Based on SigI**2 | 3.59 or SHELX Weight                              |         | 17.11   |       |      |        |
| PLAT978_ALERT_2_G               | Number C-C Bonds with Positive Residual Density.  |         | 3       |       | Info |        |

0 ALERT level A = Most likely a serious problem - resolve or explain

0 ALERT level B = A potentially serious problem, consider carefully

9 ALERT level C = Check. Ensure it is not caused by an omission or oversight

16 ALERT level G = General information/check it is not something unexpected

3 ALERT type 1 CIF construction/syntax error, inconsistent or missing data

8 ALERTtype 2 Indicator that the structure model may be wrong or deficient

6 ALERTtype 3 Indicator that the structure quality may be low

6 ALERTtype 4 Improvement, methodology, query or suggestion

2 ALERTtype 5 Informative message, check

It is advisable to attempt to resolve as many as possible of the alerts in all categories. Often the minor alerts point to easily fixed oversights, errors and omissions in your CIF or refinement strategy, so attention to these fine details can be worthwhile. In order to resolve some of the more serious problems it may be necessary to carry out additional measurements or structure refinements. However, the purpose of your study may justify the reported deviations and the more serious of these should normally be commented upon in the discussion or experimental section of a paper or in the "special\_details" fields of the CIF. checkCIF was carefully designed to identify outliers and unusual parameters, but every test has its limitations and alerts that are not important in a particular case may appear. Conversely, the absence of alerts does not guarantee there are no aspects of the results needing attention. It is up to the individual to critically assess their own results and, if necessary, seek expert advice.

Publication of your CIF in IUCr journals

A basic structural check has been run on your CIF. These basic checks will be run on all CIFs submitted for publication in IUCr journals (Acta Crystallographica, Journal of Applied Crystallography, Journal of Synchrotron Radiation); however, if you intend to submit to Acta Crystallographica Section C or E or IUCrData, you should make sure that full publication checks are run on the final version of your CIF prior to submission.

Publication of your CIF in other journals

Please refer to the Notes for Authors of the relevant journal for any special instructions relating to CIF submission.

PLATON version of 11/11/2024; check.def file version of 11/11/2024

Datablock sk5c\_auto - ellipsoid plot

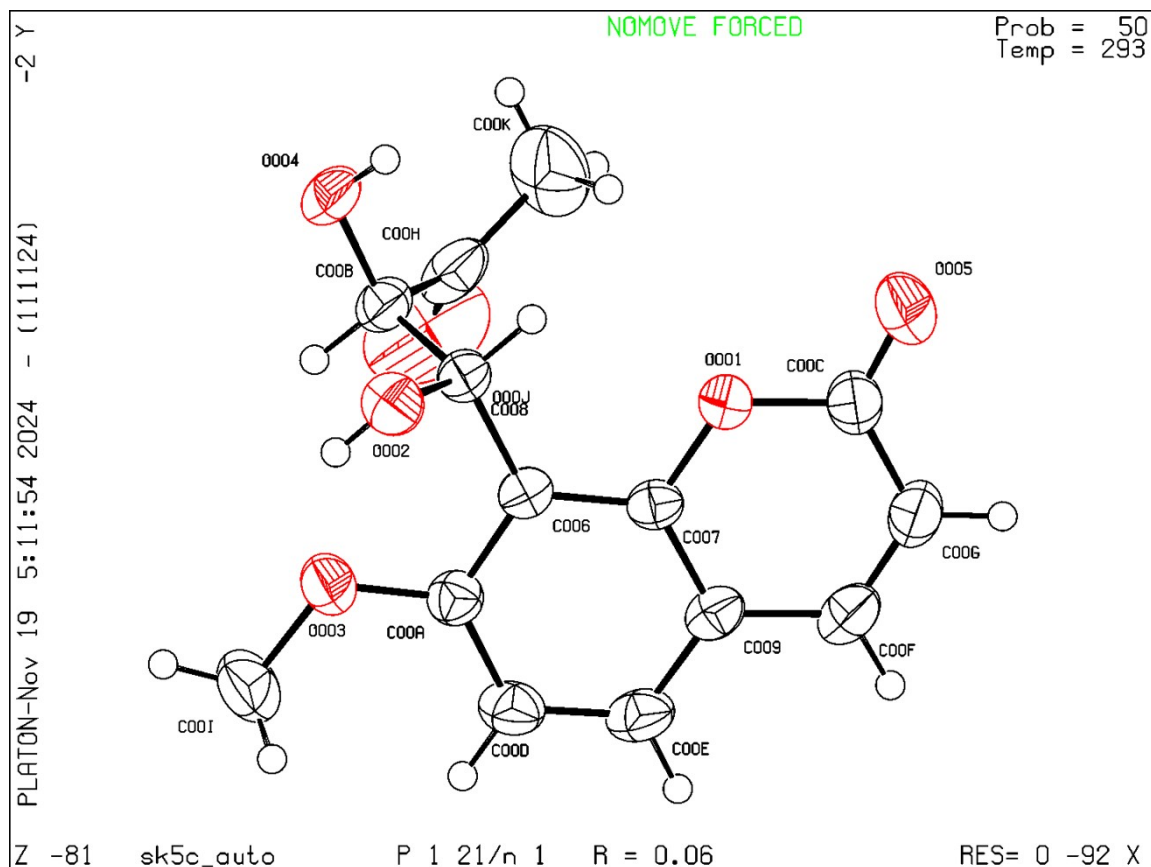

### Spectral information of Podurin B

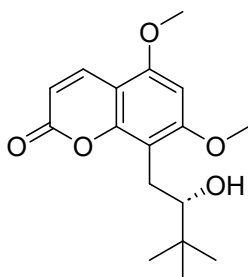

**Figure S.4.** X-ray data of Podurin B

checkCIF/PLATON report

Structure factors have been supplied for datablock(s) sk10a\_autored

THIS REPORT IS FOR GUIDANCE ONLY. IF USED AS PART OF A REVIEW PROCEDURE FOR PUBLICATION, IT SHOULD NOT REPLACE THE EXPERTISE OF AN EXPERIENCED CRYSTALLOGRAPHIC REFEREE.

No syntax errors found. CIF dictionary Interpreting this report

Datablock: sk10a\_autored

---

Bond precision: C-C = 0.0060 Å Wavelength=1.54184

Cell: a=6.7946(1) b=9.8825(1) c=22.9394(3)  
alpha=90 beta=90 gamma=90

Temperature: 293 K

|                | Calculated  | Reported    |
|----------------|-------------|-------------|
| Volume         | 1540.33(3)  | 1540.33(3)  |
| Space group    | P 21 21 21  | P 21 21 21  |
| Hall group     | P 2ac 2ab   | P 2ac 2ab   |
| Moiety formula | C17 H22 O5  | C17 H22 O5  |
| Sum formula    | C17 H22 O5  | C17 H22 O5  |
| Mr             | 306.35      | 306.34      |
| Dx,g cm-3      | 1.321       | 1.321       |
| Z              | 4           | 4           |
| Mu (mm-1)      | 0.795       | 0.795       |
| F000           | 656.0       | 656.0       |
| F000'          | 658.15      |             |
| h,k,lmax       | 8,11,27     | 8,11,27     |
| Nref           | 2812[ 1650] | 2435        |
| Tmin,Tmax      | 0.895,0.931 | 0.895,1.000 |
| Tmin'          | 0.895       |             |

Correction method= # Reported T Limits: Tmin=0.895 Tmax=1.000 AbsCorr = MULTI-SCAN

Data completeness= 1.48/0.87 Theta(max)= 68.114

R(reflections)= 0.0566( 2173) wR2(reflections)=  
0.1984( 2435)

S = 1.084 Npar= 206



The following ALERTS were generated. Each ALERT has the format

test-name\_ALERT\_alert-type\_alert-level.

Click on the hyperlinks for more details of the test.

---

 Alert level B

PLAT420\_ALERT\_2\_B D-H Bond Without Acceptor O4 --H4 . Please Check

---

 Alert level C

PLAT094\_ALERT\_2\_C Ratio of Maximum / Minimum Residual Density .... 3.48 Report  
PLAT242\_ALERT\_2\_C Low 'MainMol' Ueq as Compared to Neighbors of C5  
Check PLAT340\_ALERT\_3\_C Low Bond Precision on C-C Bonds ..... 0.006 Ang.

PLAT767\_ALERT\_4\_C INS Embedded LIST 6 Instruction Should be LIST 4 Please Check  
PLAT911\_ALERT\_3\_C Missing FCF Refl Between Thmin & STh/L= 0.600 4 Report

5 9 6, 7 5 8, 7 3 12, 2 5 24,

PLAT915\_ALERT\_3\_C No Flack x Check Done: Low Friedel Pair Coverage 69 %

---

 Alert level G

PLAT002\_ALERT\_2\_G Number of Distance or Angle Restraints on AtSite 4 Note PLAT003\_ALERT\_2\_G  
Number of Uiso or U(i,j) Restrained non-H-Atoms 2 Report PLAT007\_ALERT\_5\_G Number of Unrefined  
Donor-H Atoms ..... 1 Report

H4

PLAT072\_ALERT\_2\_G SHELXL First Parameter in WGHT Unusually Large 0.14 Report  
PLAT173\_ALERT\_4\_G The CIF-Embedded .res File Contains DANG Records 2  
Report PLAT177\_ALERT\_4\_G The CIF-Embedded .res File Contains DELU Records

2 Report PLAT192\_ALERT\_3\_G A Non-default DELU Restraint Value for First Par 0.0010 Report

PLAT192\_ALERT\_3\_G A Non-default DELU Restraint Value for SecondPar 0.0010 Report

PLAT192\_ALERT\_3\_G A Non-default DELU Restraint Value for First Par 0.0010 Report

PLAT192\_ALERT\_3\_G A Non-default DELU Restraint Value for SecondPar 0.0010 Report

PLAT199\_ALERT\_1\_G Reported \_cell\_measurement\_temperature ..... (K) 293 Check

PLAT200\_ALERT\_1\_G Reported \_diffn\_ambient\_temperature ..... (K) 293 Check

PLAT299\_ALERT\_4\_G Atom Site Occupancy Constrained at ..... 0.5 Check

H1A H1B H1C H1D H1E H1F

PLAT412\_ALERT\_2\_G Short Intra XH3 .. XHn H1D ..H2C . 2.12 Ang.

G

x,y,z = 1\_555 Check

PLAT415\_ALERT\_2\_G Short Inter D-H..H-X H1C ..H4 . 1.52 Ang.

G

|                   |                                                      |          |                  |       |       |        |
|-------------------|------------------------------------------------------|----------|------------------|-------|-------|--------|
|                   |                                                      |          | 1-x,-1/2+y,3/2-z | =     | 3_646 | Check  |
| PLAT415_ALERT_2_G | Short Inter                                          | D-H..H-X | H1D ..H4         | .     | 1.96  | Ang.   |
|                   |                                                      |          | 1-x,-1/2+y,3/2-z | =     | 3_646 | Check  |
| PLAT432_ALERT_2_G | Short Inter                                          | X...Y    | Contact O4 ..C1  | .     | 2.95  | Ang.   |
|                   |                                                      |          | 1-x,1/2+y,3/2-z  | =     | 3_656 | Check  |
| PLAT650_ALERT_4_G | SWAT Instruction Used to Model Solvent Disorder      |          |                  | !     |       | Report |
| PLAT791_ALERT_4_G | Model has Chirality at C4 (Sohncke SpGr)             |          |                  | S     |       | Verify |
| PLAT860_ALERT_3_G | Number of Least-Squares Restraints .....             |          |                  | 3     |       | Note   |
| PLAT909_ALERT_3_G | Percentage of I>2sig(I) Data at Theta(Max) Still     |          |                  | 72%   |       | Note   |
| PLAT912_ALERT_4_G | Missing # of FCF Reflections Above STh/L= 0.600      |          |                  | 7     |       | Note   |
| PLAT969_ALERT_5_G | The 'Henn et al.' R-Factor-gap value .....           |          |                  | 8.123 |       | Note   |
|                   | Predicted wR2: Based on SigI**2 2.44 or SHELX Weight |          |                  | 18.30 |       |        |
| PLAT978_ALERT_2_G | Number C-C Bonds with Positive Residual Density.     |          |                  | 2     |       | Info   |

0 ALERT level A = Most likely a serious problem - resolve or explain

1 ALERT level B = A potentially serious problem, consider carefully

6 ALERT level C = Check. Ensure it is not caused by an omission or oversight

24 ALERT level G = General information/check it is not something unexpected

- |    |           |   |                                                              |
|----|-----------|---|--------------------------------------------------------------|
| 2  | ALERTtype | 1 | CIF construction/syntax error, inconsistent or missing data  |
| 11 | ALERTtype | 2 | Indicator that the structure model may be wrong or deficient |
| 9  | ALERTtype | 3 | Indicator that the structure quality may be low              |
| 7  | ALERTtype | 4 | Improvement, methodology, query or suggestion                |
| 2  | ALERTtype | 5 | Informative message, check                                   |

It is advisable to attempt to resolve as many as possible of the alerts in all categories. Often the minor alerts point to easily fixed oversights, errors and omissions in your CIF or refinement strategy, so attention to these fine details can be worthwhile. In order to resolve some of the more serious problems it may be necessary to carry out additional measurements or structure refinements. However, the purpose of your study may justify the reported deviations and the more serious of these should normally be commented upon in the discussion or experimental section of a paper or in the "special\_details" fields of the CIF. checkCIF was carefully designed to identify outliers and unusual parameters, but every test has its limitations and alerts that are not important in a particular case may appear. Conversely, the absence of alerts does not guarantee there are no aspects of the results needing attention. It is up to the individual to critically assess their own results and, if necessary, seek expert advice.

Publication of your CIF in IUCr journals

A basic structural check has been run on your CIF. These basic checks will be run on all CIFs submitted for publication in IUCr journals (Acta Crystallographica, Journal of Applied Crystallography, Journal of Synchrotron Radiation); however, if you intend to submit to Acta Crystallographica Section C or E or IUCrData, you should make sure that full publication checks are run on the final version of your CIF prior to submission.

Publication of your CIF in other journals

Please refer to the Notes for Authors of the relevant journal for any special instructions relating to CIF submission.

PLATON version of 11/11/2024; check.def file version of 11/11/2024

Datablock sk10a\_autored - ellipsoid plot

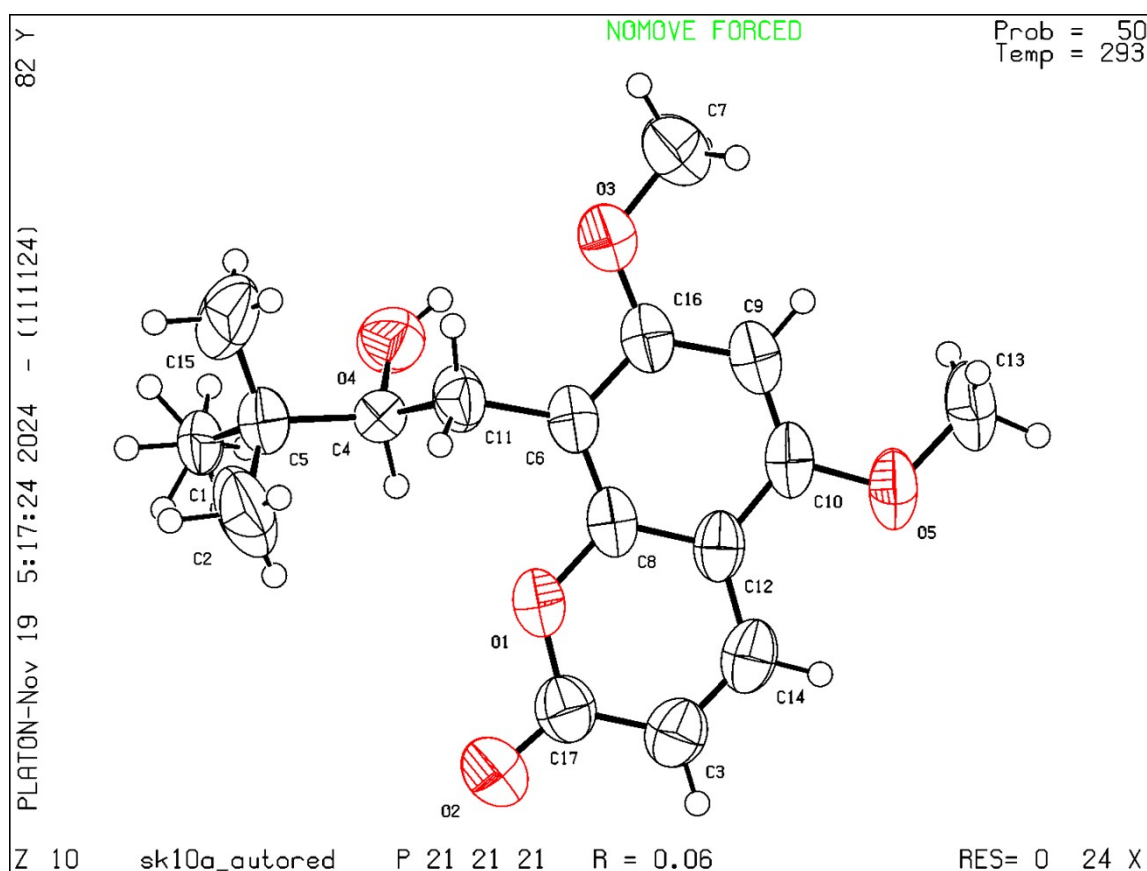

### Spectral information of Mexoticin

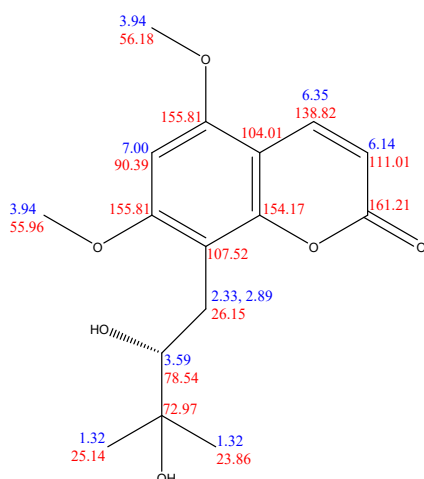

Figure S.5.  $^1\text{H}$  NMR spectrum of Mexotycin in  $\text{CDCl}_3$

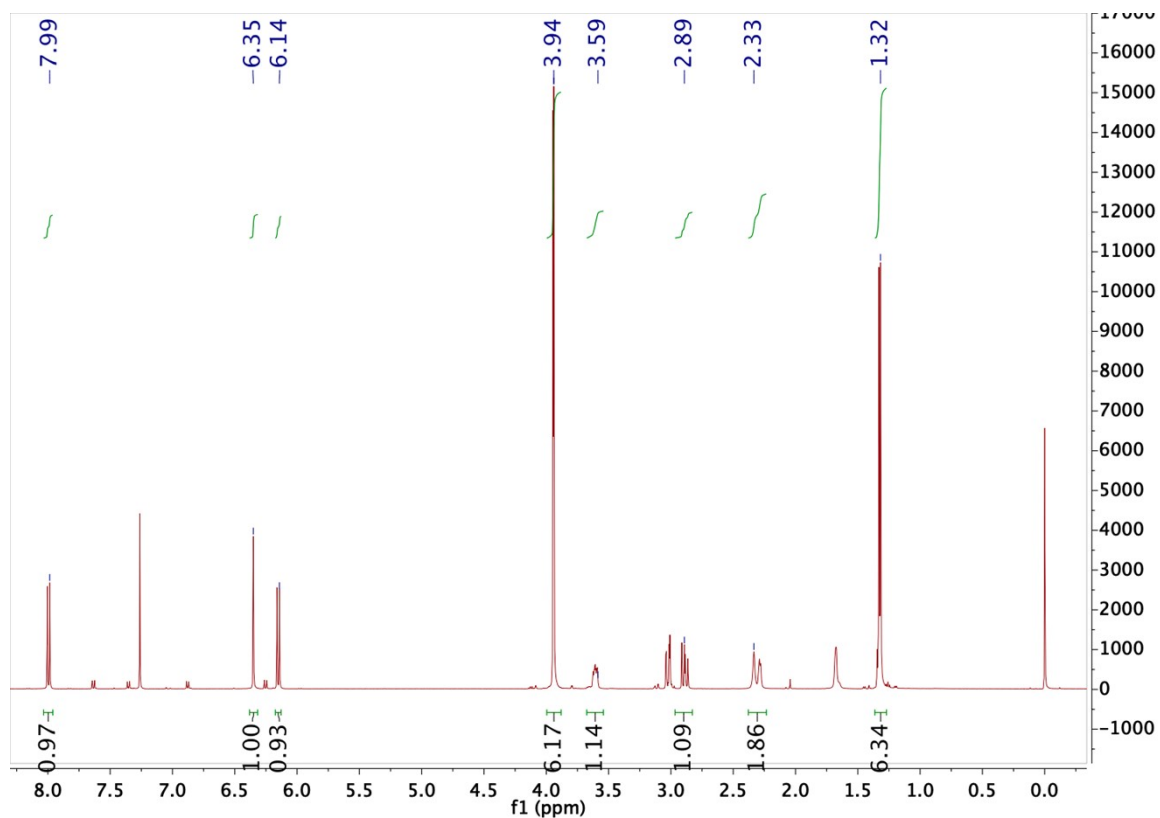

Figure S.6.  $^{13}\text{C}$  NMR spectrum of Mexotycin in  $\text{CDCl}_3$

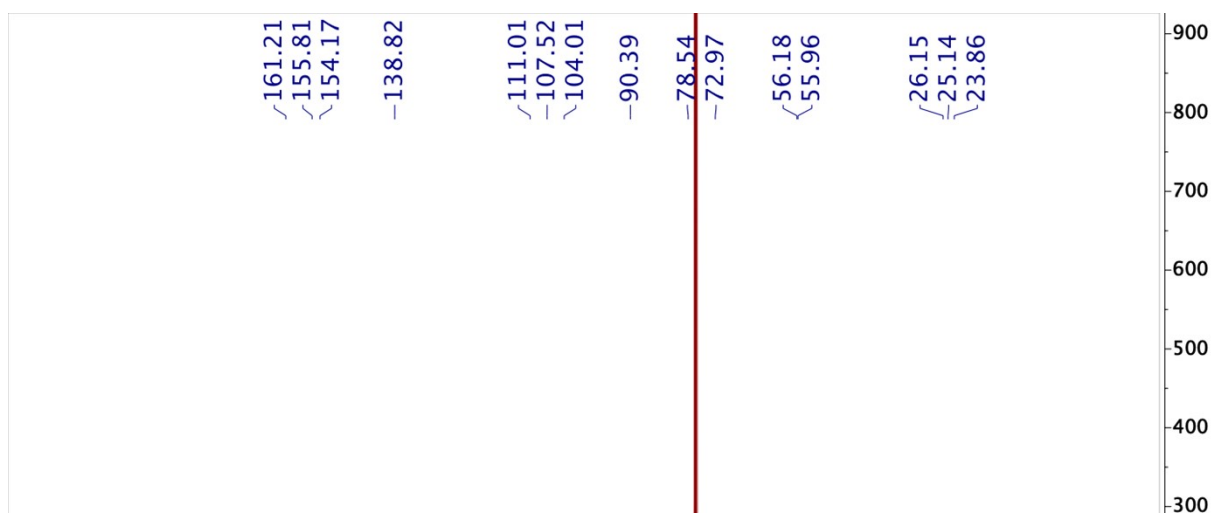

**Figure S.7.** HRMS spectrum of Mexoticin

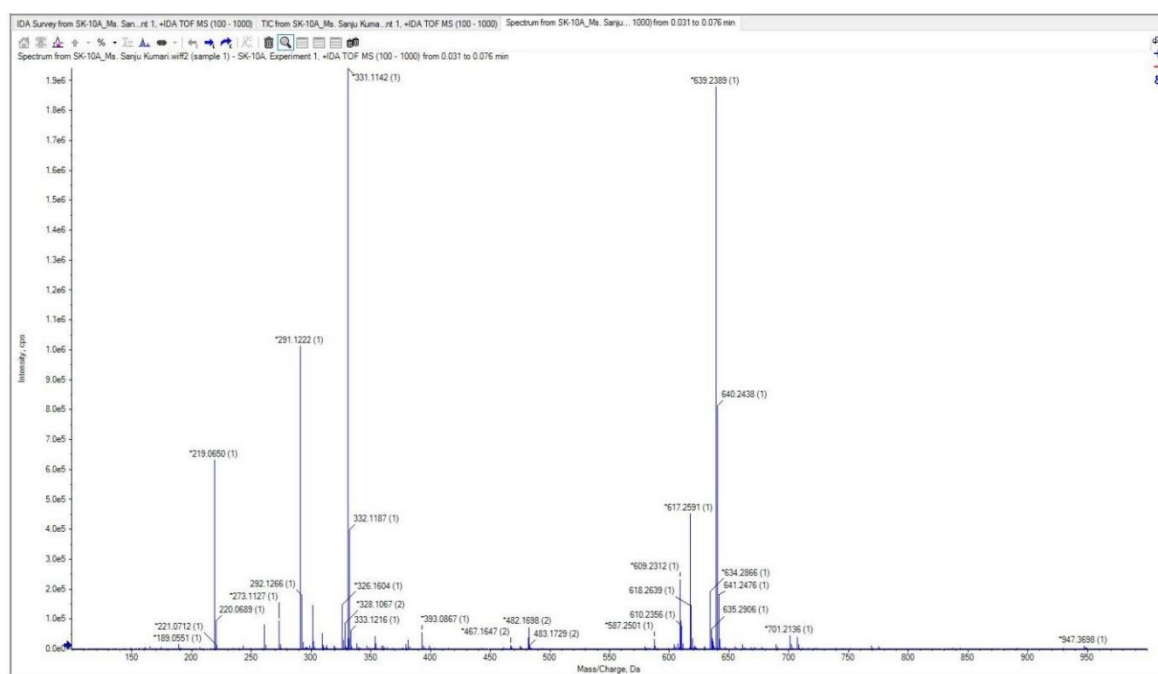

### Spectral information of Vanillin

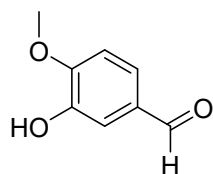

**Figure S.8.** X-ray data of Vanillin

checkCIF/PLATON report

Structure factors have been supplied for datablock(s) sk8c2\_auto

THIS REPORT IS FOR GUIDANCE ONLY. IF USED AS PART OF A REVIEW PROCEDURE FOR PUBLICATION, IT SHOULD NOT REPLACE THE EXPERTISE OF AN EXPERIENCED CRYSTALLOGRAPHIC REFEREE.

No syntax errors found. CIF dictionary Interpreting this report

---

Datablock: sk8c2\_auto

Bond precision: C-C = 0.0019 Å Wavelength=1.54184

Cell: a=5.9418(1) b=25.5269(5) beta=94.027(2) c=4.9770(1)  
alpha=90 gamma=90  
Temperature: 293 K

|                | Calculated  | Reported    |
|----------------|-------------|-------------|
| Volume         | 753.03(2)   | 753.03(2)   |
| Space group    | P 21/c      | P 1 21/c 1  |
| Hall group     | -P 2ybc     | -P 2ybc     |
| Moiety formula | C8 H8 O4    | C8 H8 O4    |
| Sum formula    | C8 H8 O4    | C8 H8 O4    |
| Mr             | 168.14      | 168.14      |
| Dx,g cm-3      | 1.483       | 1.483       |
| Z              | 4           | 4           |
| Mu (mm-1)      | 1.031       | 1.031       |
| F000           | 352.0       | 352.0       |
| F000'          | 353.33      |             |
| h,k,lmax       | 7,30,5      | 7,30,5      |
| Nref           | 1355        | 1347        |
| Tmin,Tmax      | 0.857,0.893 | 0.550,1.000 |
| Tmin'          | 0.857       |             |

Correction method= # Reported T Limits: Tmin=0.550 Tmax=1.000 AbsCorr = MULTI-SCAN

Data completeness= 0.994 Theta(max)= 68.108

R(reflections)= 0.0392( 1157) wR2(reflections)=  
0.0996( 1347)

S = 1.056 Npar= 1

---

The following ALERTS were generated. Each ALERT has the format

test-name\_ALERT\_alert-type\_alert-level.

Click on the hyperlinks for more details of the test.

■ Alert level C

|                                                                   |                         |        |           |       |
|-------------------------------------------------------------------|-------------------------|--------|-----------|-------|
| PLAT355_ALERT_3_C Long                                            | O-H (X0.82,N0.98A) O003 | - H003 | 1.03 Ang. |       |
| PLAT906_ALERT_3_C Large K Value in the Analysis of Variance ..... |                         | 2.427  |           | Check |
| PLAT911_ALERT_3_C Missing FCF Refl Between Thmin & STh/L= 0.600   |                         |        | 5 Report  |       |

7 5 0, -3 26 2, 0 22 4, 1 22 4, -4 6 5,

---

■ Alert level G

|                                                                    |          |                   |      |        |      |      |      |
|--------------------------------------------------------------------|----------|-------------------|------|--------|------|------|------|
| PLAT002_ALERT_2_G Number of Distance or Angle Restraints on AtSite | 2 Note   | PLAT007_ALERT_5_G |      |        |      |      |      |
| Number of Unrefined Donor-H Atoms .....                            | 1 Report |                   |      |        |      |      |      |
| H001                                                               |          |                   |      |        |      |      |      |
| PLAT172_ALERT_4_G The CIF-Embedded .res File Contains DFIX Records |          | 1                 |      | Report |      |      |      |
| PLAT199_ALERT_1_G Reported _cell_measurement_temperature .... (K)  | 293      |                   |      | Check  |      |      |      |
| PLAT200_ALERT_1_G Reported _diffn_ambient_temperature .... (K)     | 293      |                   |      | Check  |      |      |      |
| PLAT720_ALERT_4_G Number of Unusual/Non-Standard Labels .....      |          | 20 Note           |      |        |      |      |      |
| O001                                                               | H001     | O002              | O003 | O004   | C005 | C006 | H006 |
| C007                                                               | C008     | C009              | H009 | C00A   | C00B | H00B | C00C |
| H00A                                                               | H00C     | H00D              | H003 |        |      |      |      |
| PLAT860_ALERT_3_G Number of Least-Squares Restraints .....         | 1 Note   |                   |      |        |      |      |      |
| PLAT909_ALERT_3_G Percentage of I>2sig(I) Data at Theta(Max) Still |          | 76%               |      |        |      |      | Note |
| PLAT912_ALERT_4_G Missing # of FCF Reflections Above STh/L= 0.600  |          | 3                 |      |        |      |      | Note |
| PLAT969_ALERT_5_G The 'Henn et al.' R-Factor-gap value .....       |          | 3.651             |      |        |      |      | Note |
| Predicted wR2: Based on SigI**2 2.73 or SHELX Weight               |          | 9.43              |      |        |      |      |      |
| PLAT978_ALERT_2_G Number C-C Bonds with Positive Residual Density. |          | 0                 |      |        |      |      | Info |

---

0 ALERT level A = Most likely a serious problem - resolve or explain

0 ALERT level B = A potentially serious problem, consider carefully

3 ALERT level C = Check. Ensure it is not caused by an omission or oversight

11 ALERT level G = General information/check it is not something unexpected

2 ALERTtype 1 CIF construction/syntax error, inconsistent or missing data

2 ALERTtype 2 Indicator that the structure model may be wrong or deficient

5 ALERTtype 3 Indicator that the structure quality may be low

- 3 ALERTtype 4 Improvement, methodology, query or suggestion  
2 ALERTtype 5 Informative message, check
- 

It is advisable to attempt to resolve as many as possible of the alerts in all categories. Often the minor alerts point to easily fixed oversights, errors and omissions in your CIF or refinement strategy, so attention to these fine details can be worthwhile. In order to resolve some of the more serious problems it may be necessary to carry out additional measurements or structure refinements. However, the purpose of your study may justify the reported deviations and the more serious of these should normally be commented upon in the discussion or experimental section of a paper or in the "special\_details" fields of the CIF. checkCIF was carefully designed to identify outliers and unusual parameters, but every test has its limitations and alerts that are not important in a particular case may appear. Conversely, the absence of alerts does not guarantee there are no aspects of the results needing attention. It is up to the individual to critically assess their own results and, if necessary, seek expert advice.

Publication of your CIF in IUCr journals

A basic structural check has been run on your CIF. These basic checks will be run on all CIFs submitted for publication in IUCr journals (Acta Crystallographica, Journal of Applied Crystallography, Journal of Synchrotron Radiation); however, if you intend to submit to Acta Crystallographica Section C or E or IUCrData, you should make sure that full publication checks are run on the final version of your CIF prior to submission.

Publication of your CIF in other journals

Please refer to the Notes for Authors of the relevant journal for any special instructions relating to CIF submission.

---

PLATON version of 11/11/2024; check.def file version of 11/11/2024

Datablock sk8e2\_auto - ellipsoid plot

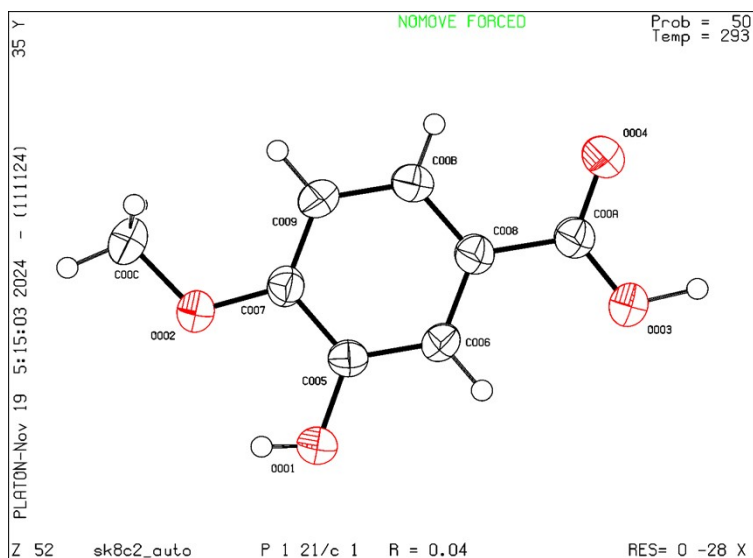

**Spectral information of Acacetin**



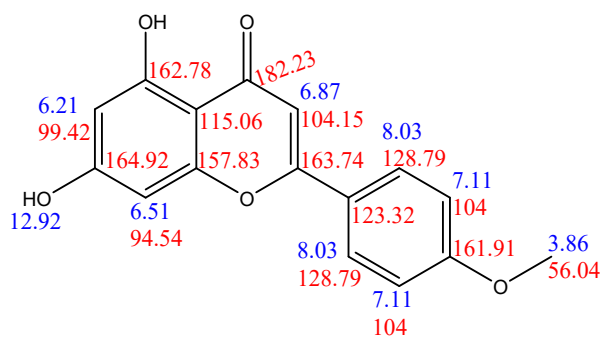

**Figure S.9.** <sup>1</sup>H NMR spectrum of Acacetin in DMSO

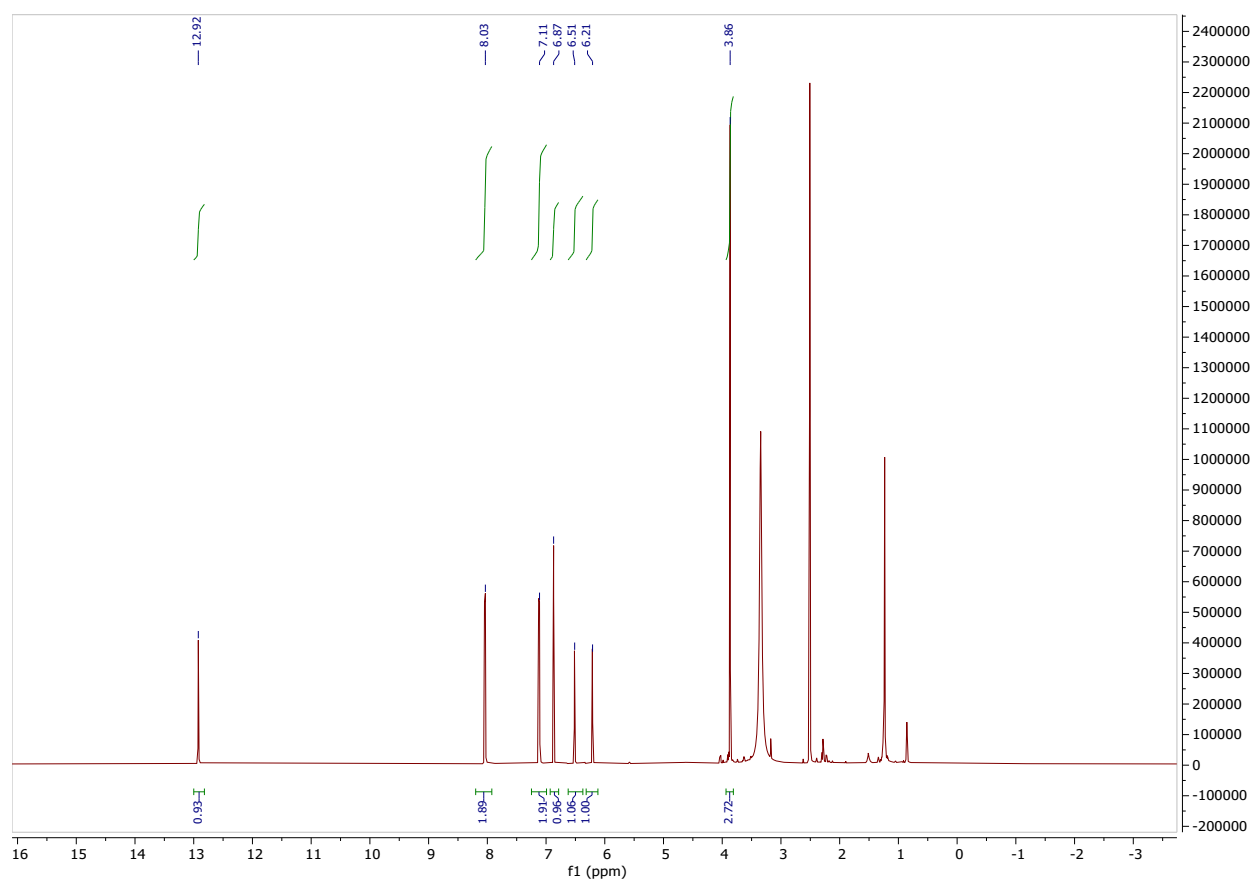

**Figure S.10.**  $^{13}\text{C}$  NMR spectrum of Acacetin in DMSO

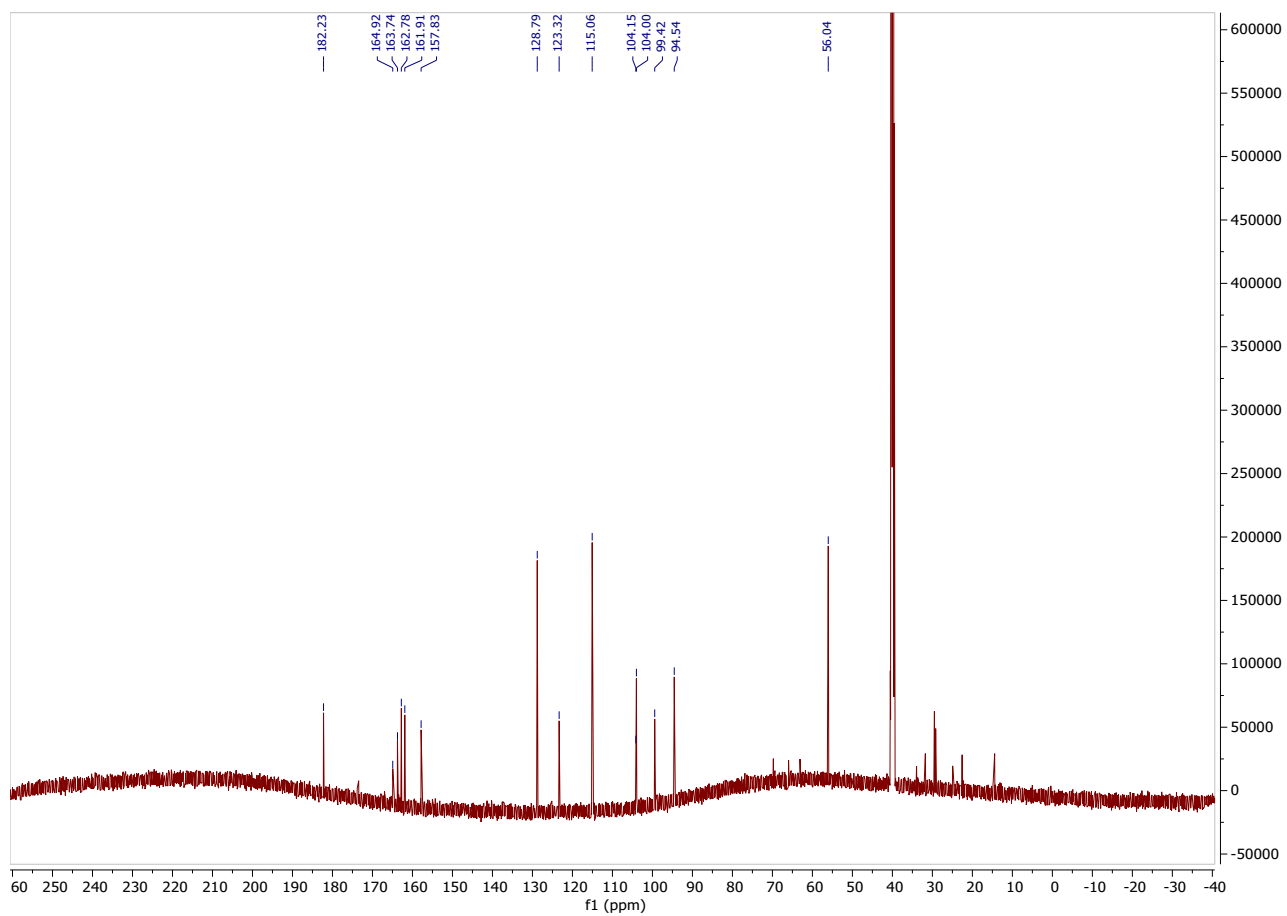

**Figure S.11.** DEPT-135 NMR spectrum of Acacetin in DMSO

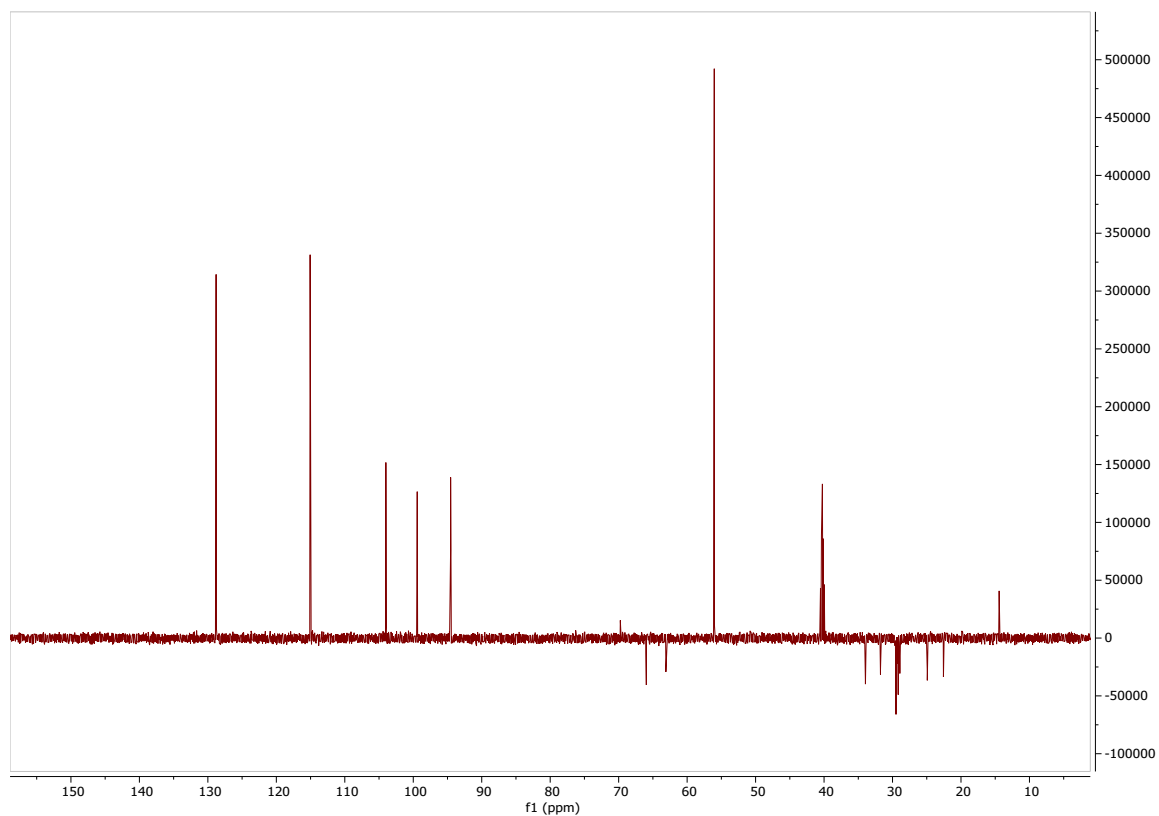



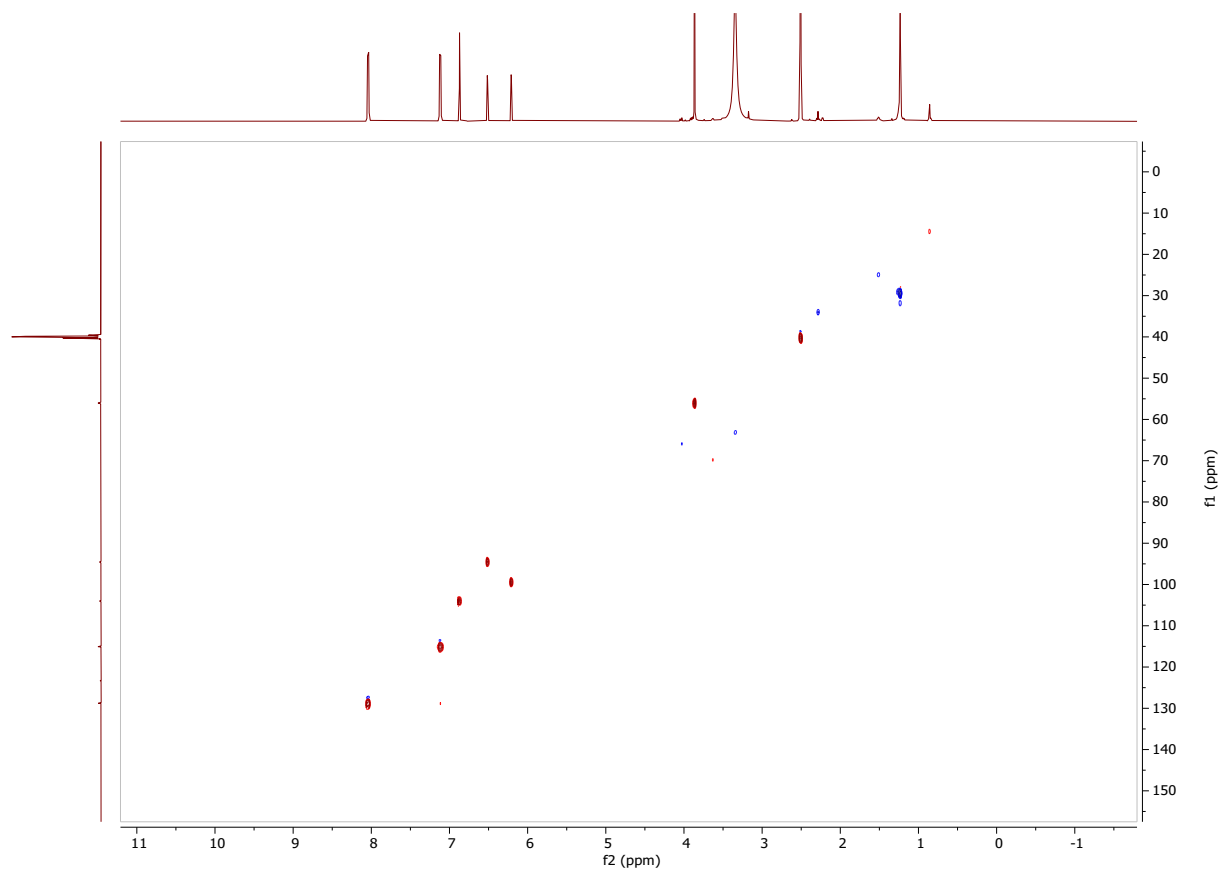

**Figure S.14.** HMBC NMR spectrum of Acacetin in DMSO

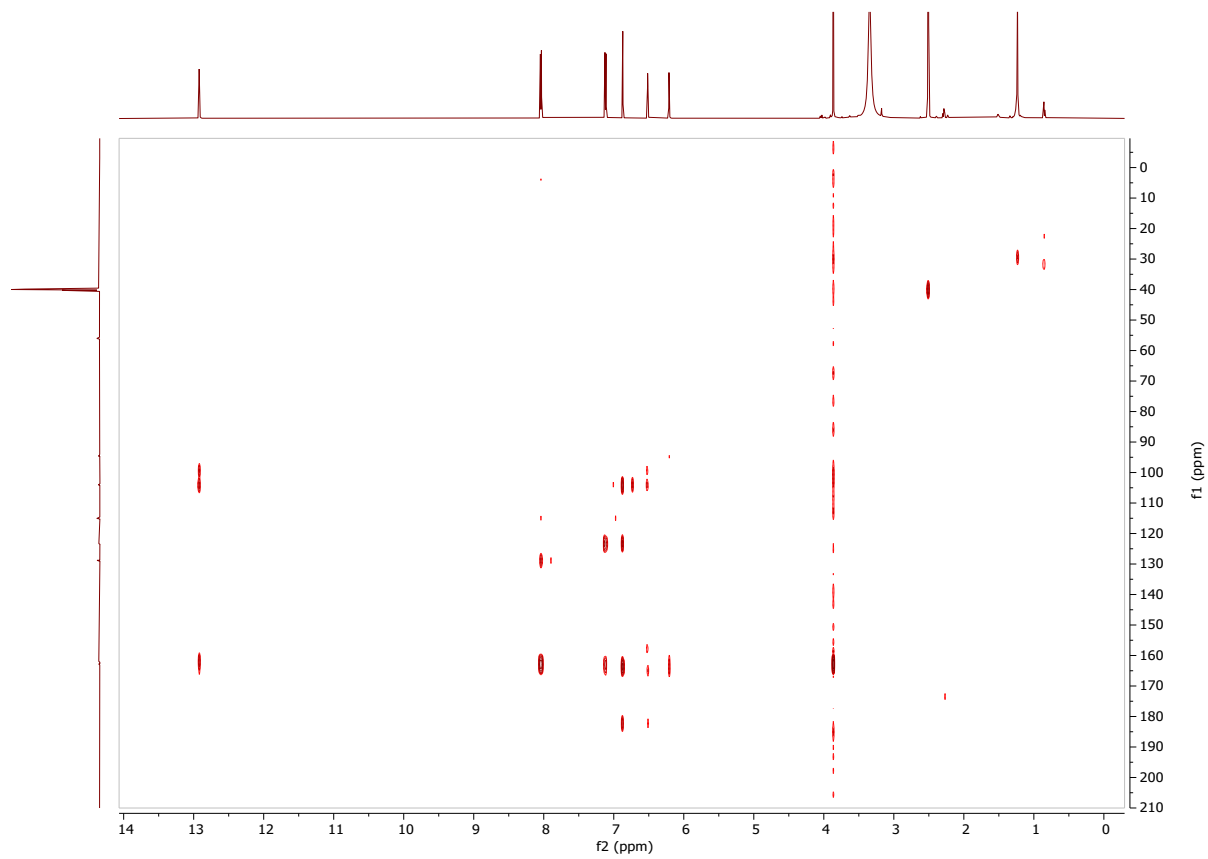

**Figure S.15.** HRMS spectrum of Acacetin

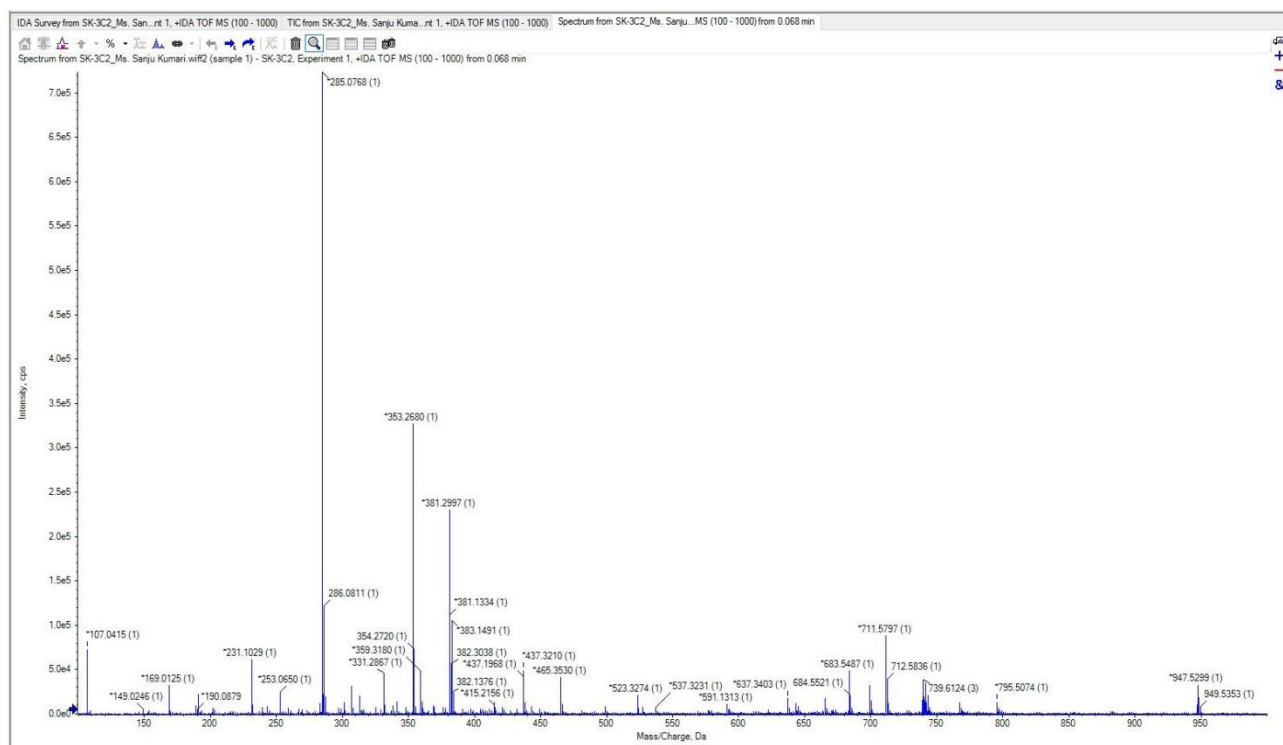

**Figure S.16.** Flow chart of isolation scheme of compounds

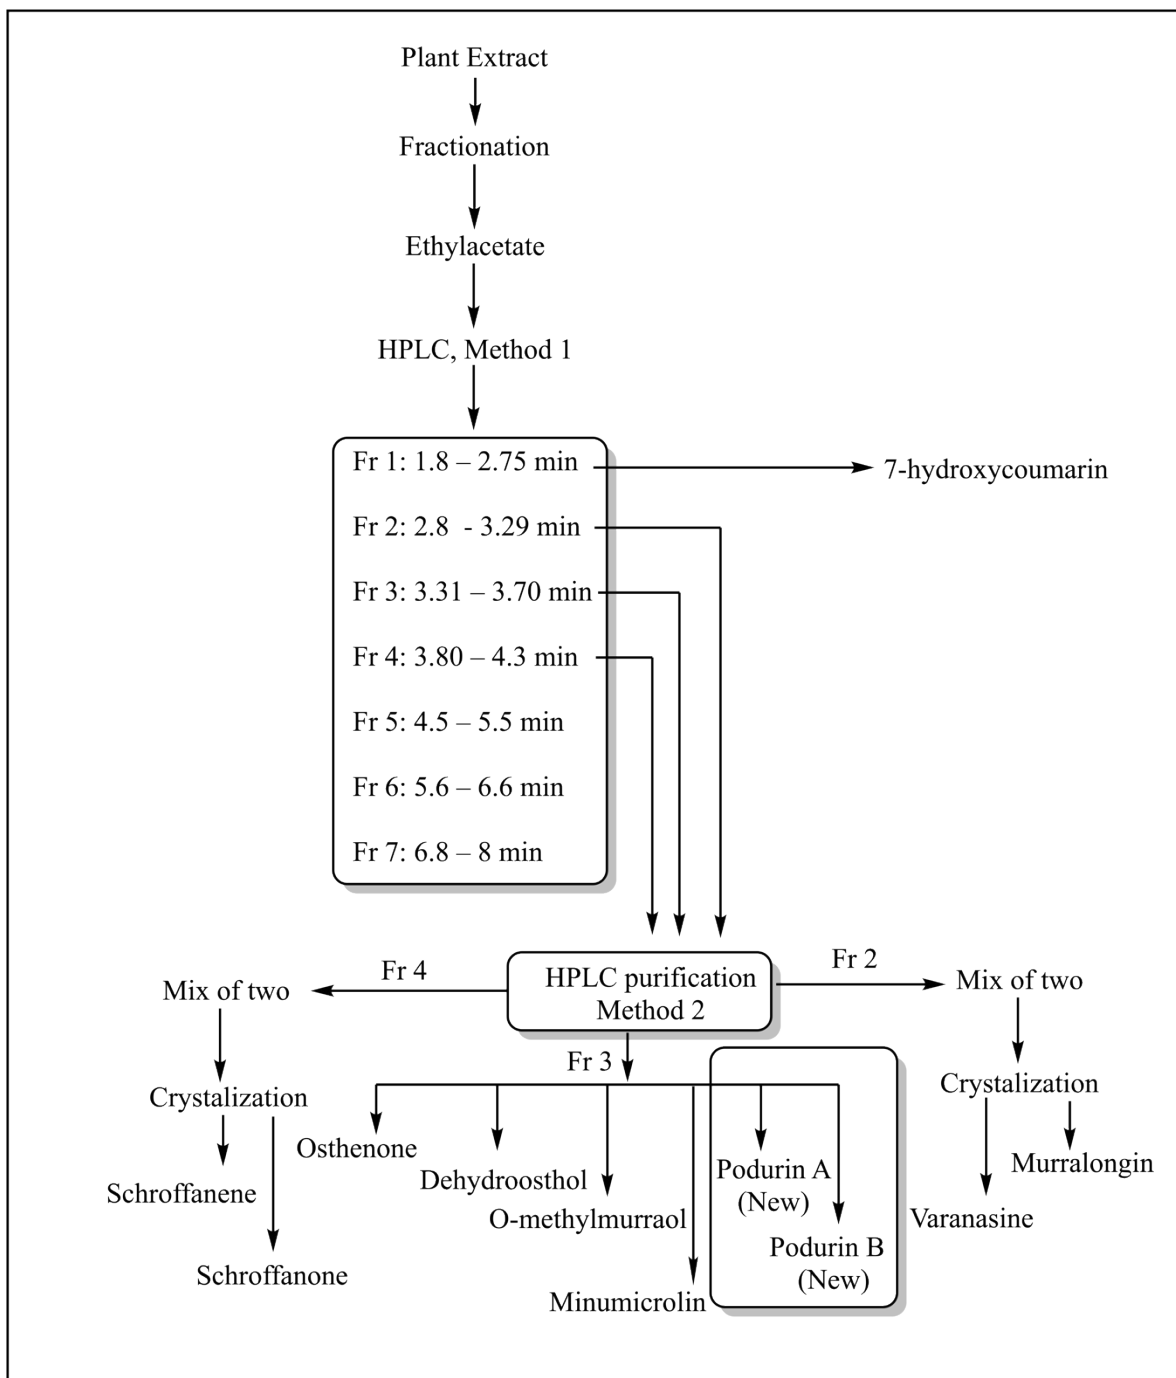

**Figure S.17.**  $^1\text{H}$  NMR spectrum of Podurin A in  $\text{CDCl}_3$

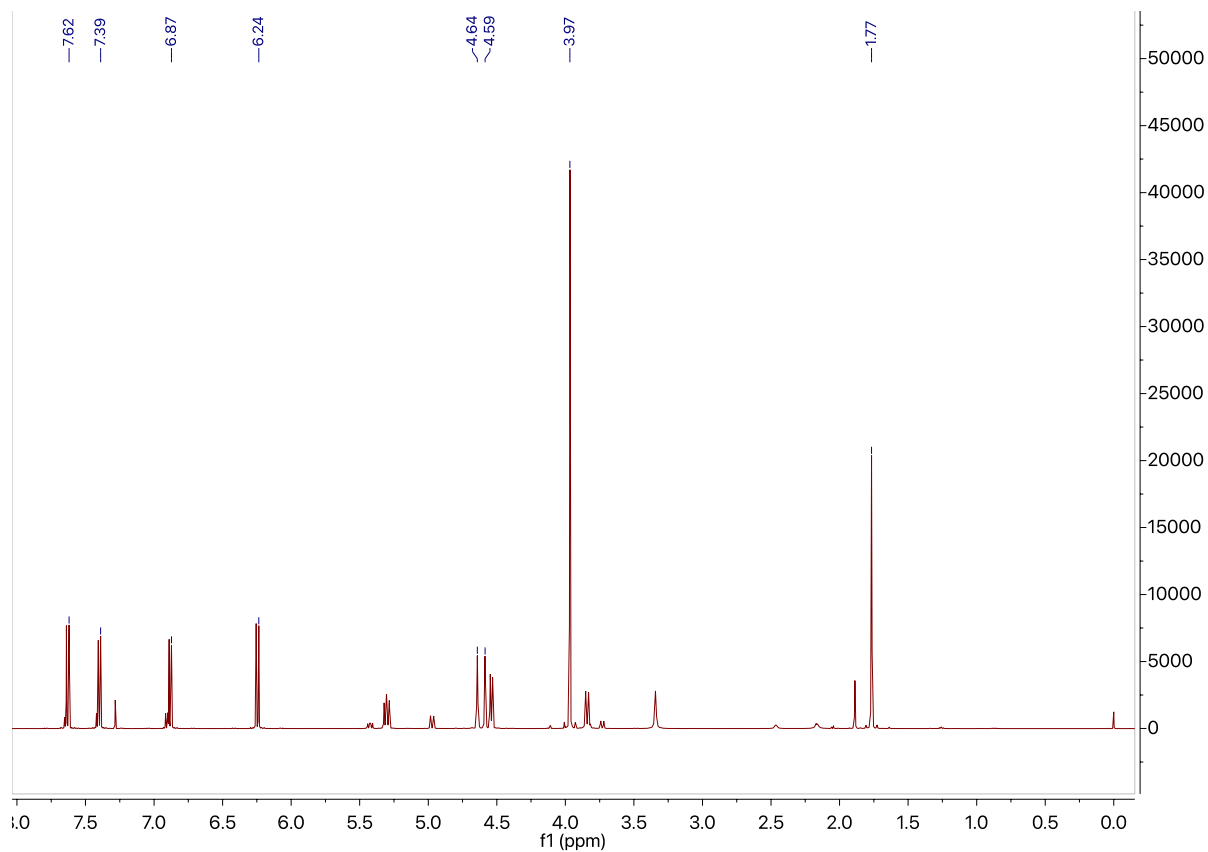

**Figure S.18.**  $^{13}\text{C}$  NMR spectrum of Podurin A in  $\text{CDCl}_3$

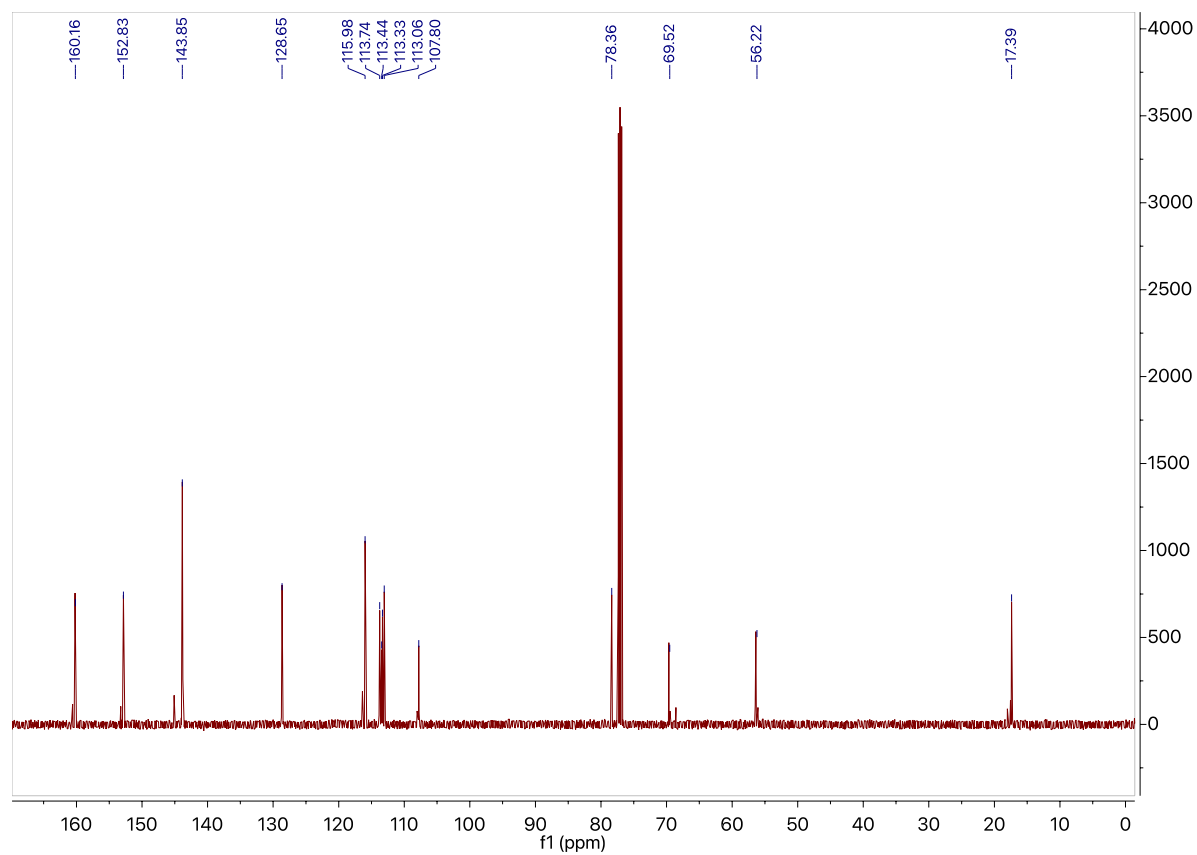

**Figure S.19.** COSY NMR spectrum of Podurin A in  $\text{CDCl}_3$

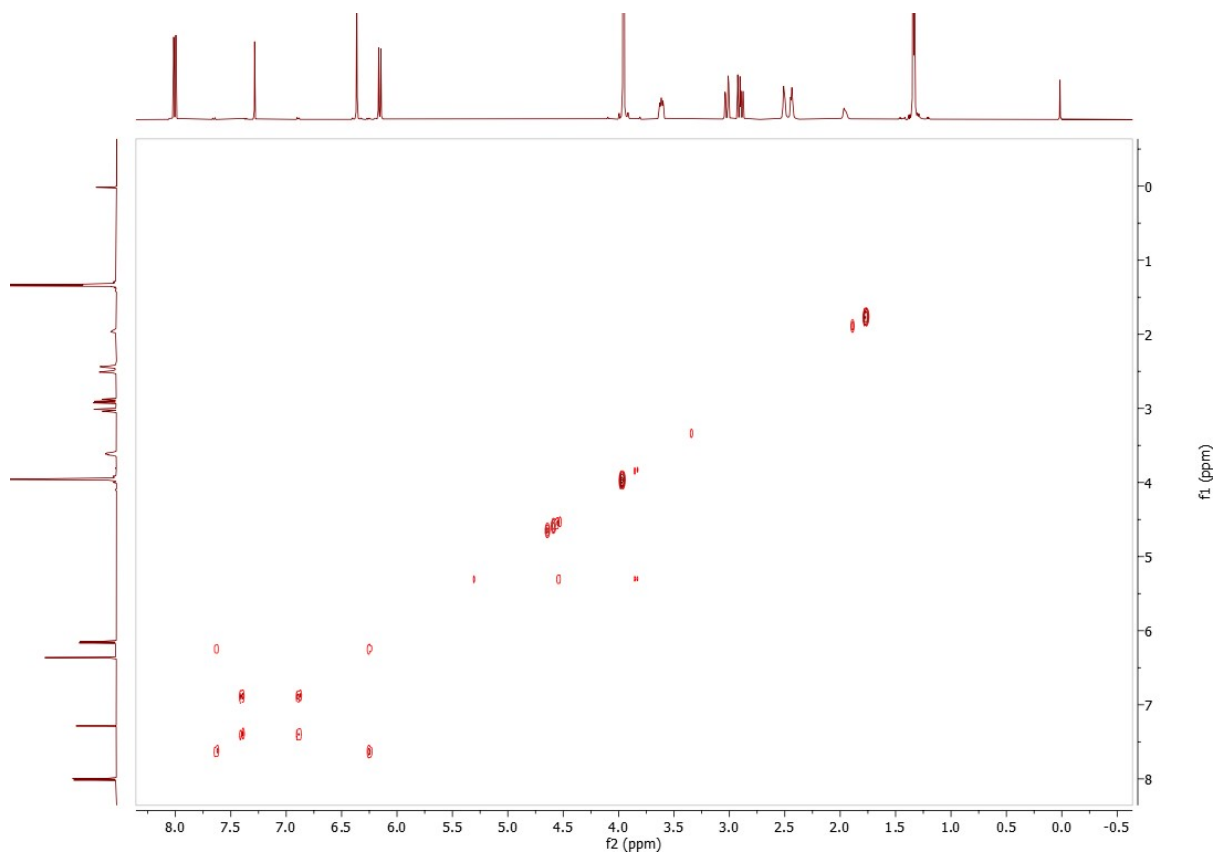

**Figure S.20.** HSQC NMR spectrum of Podurin A in  $\text{CDCl}_3$

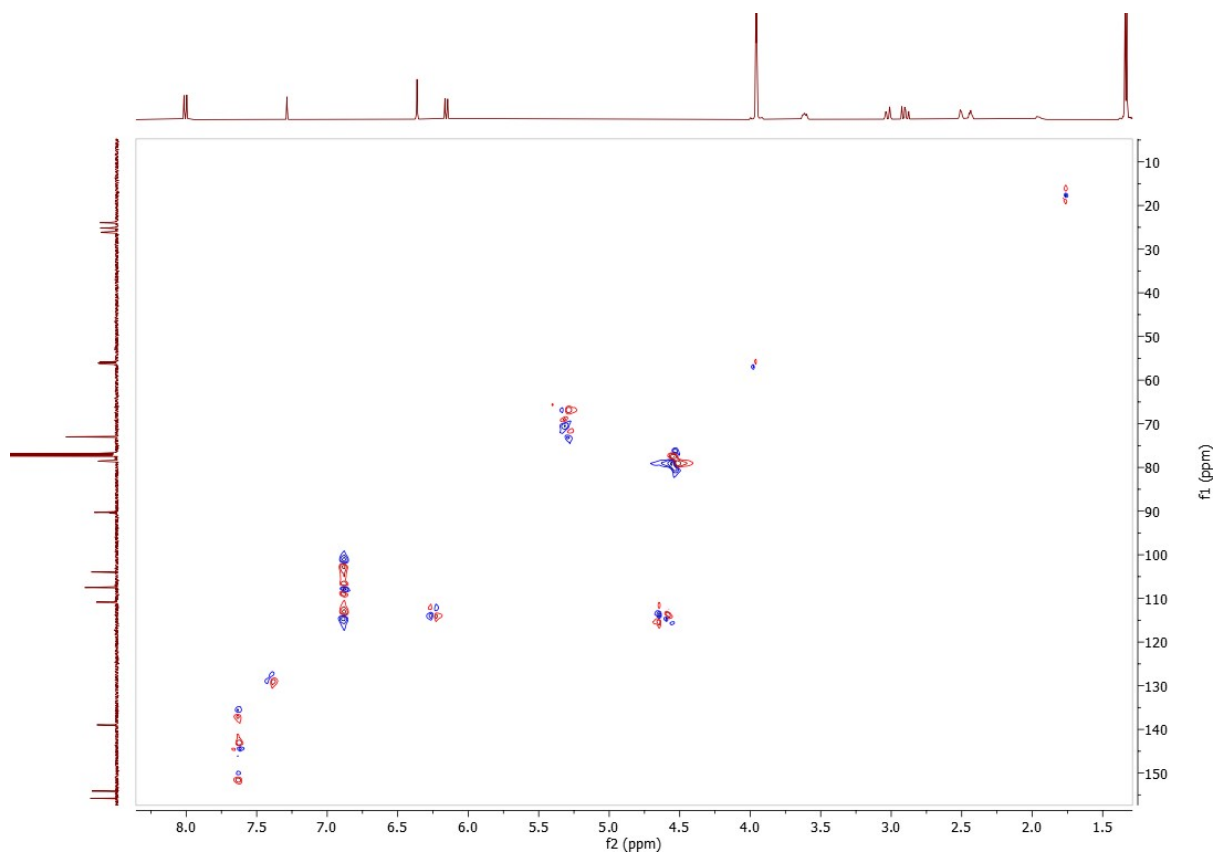

**Figure S.21.** HMBC NMR spectrum of Podurin A in  $\text{CDCl}_3$



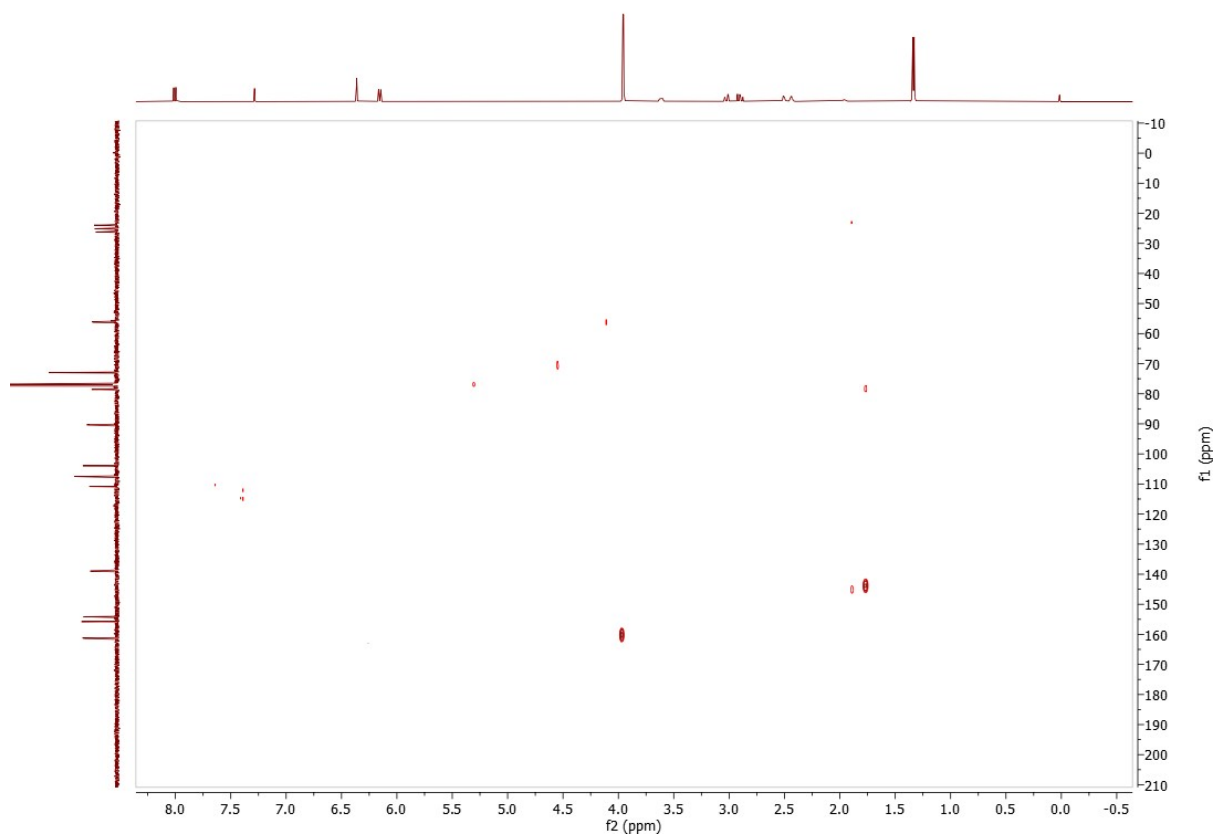

**Figure S.22.** Keto-enol conversion of Podurins A

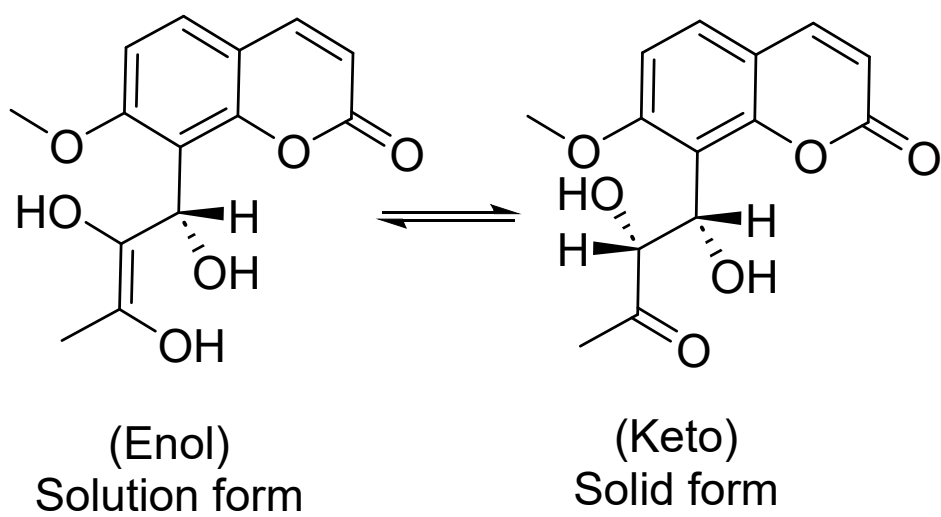

Supplement: d4nj05468g1.pdf [file d4nj05468g1.pdf]
